# Supplementary material for: ERA5-based database of Atmospheric Rivers over Himalayas
Source: Copernicus journal article supplement (doi:10.5194/essd-2020-397), 2021-02-19
Supplement: Supplementary file 1 [file Data_ReadMe.docx]

Atmospheric Rivers are long and narrow regions of intense moisture transport in the lower troposphere. The dataset comprises of Atmospheric Rivers that have happened over the Himalayan Basins from 1982 to 2018. It includes the dates and time, duration, intensity, tracks, and categories of the ARs

File Names and description:

ERA5_Persistant_Database2000km: This file includes the data, times, average intensity, starting IVT, maximum IVT, and duration of ARs.

ERA5_Persistant_Database_lats_2000km: The file gives the latitudes of grid points of maximum IVT, i.e., the latitude of major axes of ARs throughout their duration

ERA5_Persistant_Database_lons_2000km: The file gives the longitudes of grid points of maximum IVT, i.e., the longitudes of major axes of ARs throughout their duration

ERA5_Persistant_Database_ivt_2000km: The file gives the IVT along the ARs' major axis.
